# Supplementary material for: Low Adenovirus Vaccine Doses Administered to Skin Using Microneedle Patches Induce Better Functional Antibody Immunogenicity as Compared to Systemic Injection
Source: MDPI journal article supplement (doi:10.3390/vaccines9030299), 2021-03-22

**Figure S1: Graphical representation of immunization regimes and schedules used in this study**

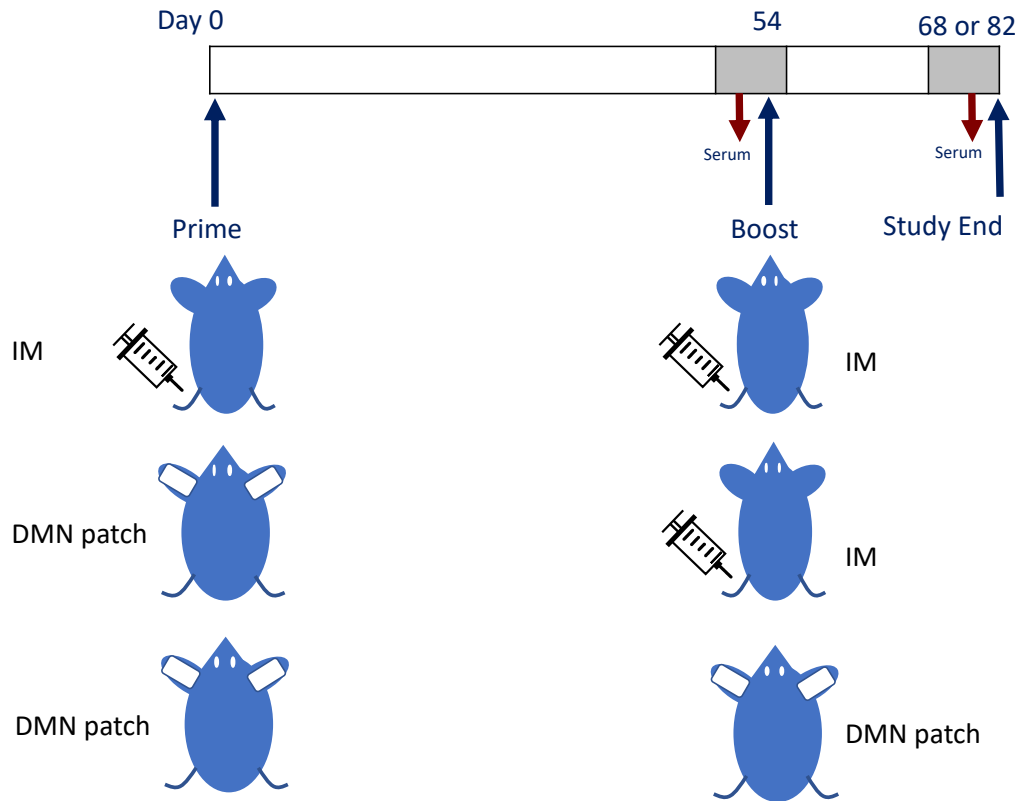

Supplement: s1 [file s1]
